# Supplementary material for: Downregulation of Squalene Synthase Broadly Impacts Isoprenoid Biosynthesis in Guayule
Source: Metabolites. 2022 Mar 29;12(4):303. doi: 10.3390/metabo12040303 (PMC9030042; doi:10.3390/metabo12040303)
Supplement: Supplementary file 1 [file metabolites-12-00303-s001.zip › metabolites-1644847 Table S1.xlsx]

## Sheet: TableS1
Table S1: Metabolites content (µg/g) of 5-month-old guayule tissues.
Genotype	Tissue	Rubber			Resin			Squalene			Acetyl CoA			HMG-CoA			MVA			MVAP			IPP/DMAPP			GPP			FPP			DXP			MEP			CDP-ME			MEcPP			HMB-PP			Pyr
		Avg.	SE	t.test	Avg.	SE	t.test	Avg.	SE	t.test	Avg.	SE	t.test	Avg.	SE	t.test	Avg.	SE	t.test	Avg.	SE	t.test	Avg.	SE	t.test	Avg.	SE	t.test	Avg.	SE	t.test	Avg.	SE	t.test	Avg.	SE	t.test	Avg.	SE	t.test	Avg.	SE	t.test	Avg.	SE	t.test	Avg.	SE	t.test
WT	Stem	1282.14	106.612	1	37061.9	391.718	1	28.7388	2.63776	1	0.383053	0.0702219	1	0.309472	0.0644582	1	0.284992	0.0549899	1	0.0113956	0.00103244	1	0	0	n.a.	0.0588324	0.00512783	1	0	0	n.a.	0.00432189	0.00237608	1	0.442281	0.0663386	1	0	0	n.a.	0.996178	0.243491	1	0.0700176	0.00458787	1	5.65299	3.31011	1
VC	Stem	1920.8	447.4	0.237274	37429.6	1648.01	0.838774	29.763	5.58231	0.582551	0.270871	0.0114148	0.0866213	0.399203	0.0555153	0.351015	0.359631	0.0534524	0.385525	0.00924431	0.00201579	0.395968	0	0	n.a.	0.0487488	0.00913613	0.390319	0	0	n.a.	0.00163962	0.00163962	0.405418	0.283115	0.0186232	0.0820324	0	0	n.a.	0.564651	0.0611537	0.160763	0.0129069	0.0129069	0.0140395	7.16418	1.57291	0.701224
SQSi-J	Stem	1389.26	316.587	0.76451	41508.2	2443.75	0.100114	12.381	3.75718	0.0366878	0.144322	0.0268801	0.0211063	0.283691	0.0215042	0.723662	0.152019	0.0286144	0.0985217	0	0	0.00038306	0	0	n.a.	0.0574771	0.00704915	0.883983	0	0	n.a.	0.00600886	0.00126623	0.564926	0.479122	0.0702407	0.722357	0	0	n.a.	0.929791	0.0574439	0.803845	0.0546827	0.0060164	0.706841	4.67071	0.999516	0.790447
SQSi-L	Stem	1508.24	181.03	0.342412	39628.3	163.458	0.00377455	10.4727	0.371922	0.0173729	0.11456	0.062887	0.0289266	0.29538	0.0275024	0.850445	0.157867	0.00545743	0.0828941	0	0	0.00038306	0	0	n.a.	0.0480089	0.00286648	0.139211	0	0	n.a.	0.0065651	0.000225349	0.400501	0.84188	0.119037	0.0427148	0	0	n.a.	1.28196	0.0604471	0.318245	0.0669144	0.00838528	0.761703	4.26601	0.220273	0.697353
SQSi-M	Stem	1353.73	303.355	0.834718	30778.6	1197.63	0.00756254	14.0094	0.948767	0.0296862	0	0	0.00458817	0.249528	0.0127401	0.413212	0.21751	0.00788329	0.291264	0	0	0.00038306	0	0	n.a.	0.0459676	0.00949554	0.299109	0	0	n.a.	0.00678586	0.00340297	0.584678	0.587593	0.044123	0.142235	0	0	n.a.	0.876612	0.0553738	0.657063	0.0599773	0.00939233	0.391187	4.9525	0.70922	0.846175
WT	Leaf	1309.85	68.4183	1	59494.2	2132.39	1	13.715	0.289556	1	0	0	n.a.	0	0	n.a.	0.258538	0.0656687	1	0	0	n.a.	0.0571132	0.0234397	1	0	0	n.a.	0.127774	0.0431507	1	0	0	n.a.	0.324079	0.139661	1	0.0301318	0.0301318	1	0.221914	0.0717384	1	0.939089	0.21285	1	1.55356	0.545616	1
VC	Leaf	1277.97	81.1114	0.778832	55907.3	713.824	0.239171	10.5878	1.04004	0.0442666	0	0	n.a.	0	0	n.a.	0.222861	0.0303567	0.647765	0	0	n.a.	0.0576373	0.029562	0.989581	0	0	n.a.	0.131481	0.0253801	0.944524	0	0	n.a.	0.168111	0.0413778	0.344588	0	0	0.373901	0.16866	0.0252698	0.52241	0	0	0.0115829	3.3716	0.95096	0.166428
SQSi-J	Leaf	1551.18	40.6134	0.0386609	59591	754.693	0.290771	15.1753	1.27275	0.325888	0	0	n.a.	0	0	n.a.	0.409113	0.102786	0.28458	0	0	n.a.	0.0794949	0.00985852	0.428466	0	0	n.a.	0.099967	0.0119145	0.00110404	0	0	0.00150108	0.310459	0.0469365	0.930796	0.129894	0.0386754	0.111598	0.185754	0.0442825	0.690075	1.24925	0.12792	0.279777	3.27574	0.637128	0.109307
SQSi-L	Leaf	1264.17	46.7331	0.610749	59594.3	1761.56	0.972872	10.9027	2.007	0.237755	0	0	n.a.	0	0	n.a.	0.718669	0.387807	0.307013	0	0	n.a.	0.174016	0.034388	0.0483643	0	0	n.a.	0.121961	0.0167331	0.906115	0	0	n.a.	0.323606	0.0432656	0.997578	0.0590863	0.0136092	0.430606	0.134916	0.00147783	0.292054	1.88138	0.0194915	0.0116134	1.27545	0.742086	0.777748
SQSi-M	Leaf	1509.68	26.8398	0.0530415	59792.3	2583.05	0.933375	7.06324	0.407342	0.795414	0	0	n.a.	0	0	n.a.	0.32794	0.0802326	0.539903	0	0	n.a.	0.0703362	0.0363829	0.775207	0	0	n.a.	0.147945	0.00856781	0.6704	0	0	n.a.	0.42784	0.124437	0.608649	0.084681	0.0446556	0.368527	0.163692	0.033696	0.503331	0.471407	0.241489	0.219918	4.1367	0.655448	0.0388215
WT	Roots	3607.59	747.077	1	21256.3	824.608	1	5.34326	3.0922	1	0	0	n.a.	0	0	n.a.	0.172472	0.050234	1	0	0	n.a.	0.0436742	0.0216659	1	0	0	n.a.	0	0	n.a.	0	0	n.a.	0	0	1	0	0	n.a.	0.88224	0.183652	1	0.089227	0.0136871	1	2.74823	0.821372	1
VC	Roots	5167.3	571.405	0.172596	22406.9	251.536	0.252931	3.71226	0.0679333	0.564105	0	0	n.a.	0.139147	0.0142149	0.000610383	0.112451	0.0150897	0.316319	0	0	n.a.	0.045839	0.00523267	0.927299	0.162032	0.0353328	0.0101383	0	0	n.a.	0	0	n.a.	0.0836616	0.0154937	0.00569334	0	0	n.a.	0.145389	0.0153496	0.0161534	0.0655648	0.00738206	0.202761	3.18123	0.157929	0.63199
SQSi-J	Roots	4019.82	613.162	0.691676	23335.5	490.254	0.0960984	5.40551	0.55847	0.985145	0	0	n.a.	0.135591	0.0110041	0.000249242	0.265018	0.0852631	0.402639	0	0	n.a.	0.0280708	0.00064447	0.511426	0.191616	0.0244523	0.00143209	0	0	n.a.	0	0	n.a.	0.0932812	0.00764289	0.00025871	0	0	n.a.	0.284529	0.0139167	0.0315162	0.223249	0.0437414	0.0430642	2.63498	0.0938724	0.897659
SQSi-L	Roots	4780.86	278.399	0.215094	21232.5	266.428	0.979323	5.01309	1.15688	0.925151	0	0	n.a.	0.145812	0.0136272	0.000432236	0.231623	0.00230168	0.30471	0	0	n.a.	0.0471543	0.00335931	0.881573	0.143434	0.00579869	1.58541e-05	0	0	n.a.	0	0	n.a.	0.127244	0.00124113	5.42759e-08	0	0	n.a.	0.299904	0.025125	0.0347941	0.122546	0.0362939	0.438773	3.64673	0.766323	0.468611
SQSi-M	Roots	5972.57	272.143	0.0409633	19511.3	1390.46	0.145	2.69479	0.875477	0.496298	0	0	n.a.	0.127138	0.015908	0.00132891	0.397691	0.0128693	0.0122227	0	0	n.a.	0.0216509	0.0014395	0.367821	0.121343	0.0148603	0.00122455	0	0	n.a.	0	0	n.a.	0.103416	0.00458003	2.27832e-05	0	0	n.a.	0.209861	0.0237846	0.0221436	0.105372	0.0114808	0.417226	3.38482	0.558521	0.556465
Standard Error (SE)
3-Hydroxy-3-methylglutaryl-CoA (HMG-CoA)
Mevalonate (MVA)
Mevalonate phosphate (MVAP)
Isopentenyl pyrophosphate (IPP)/Dimethylallyl diphosphate (DMAPP)
Geranyl diphosphate (GPP)
Farnesyl diphosphate (FPP)
1-Deoxy-D-xylulose 5-phosphate (DOXP; DXP)
2-C-methylerythritol 4-phosphate (MEP)
4-diphosphocytidyl-2-C-methylerythritol (CDP-ME)
2-C-methyl-D-erythritol 2,4-cyclodiphosphate (MEcPP)
(E)-4-Hydroxy-3-methyl-but-2-enyl pyrophosphate (HMB-PP)
Pyruvate (Pyr)
p < 0.05
p < 0.005
